# Supplementary figures and images for: Experimental Infection of Newly Hatched Domestic Ducklings via Japanese Encephalitis Virus-Infected Mosquitoes
Source: MDPI journal article supplement (doi:10.3390/pathogens9050371), 2020-05-12

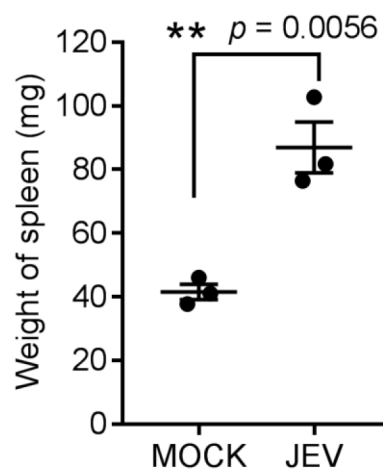

(a)

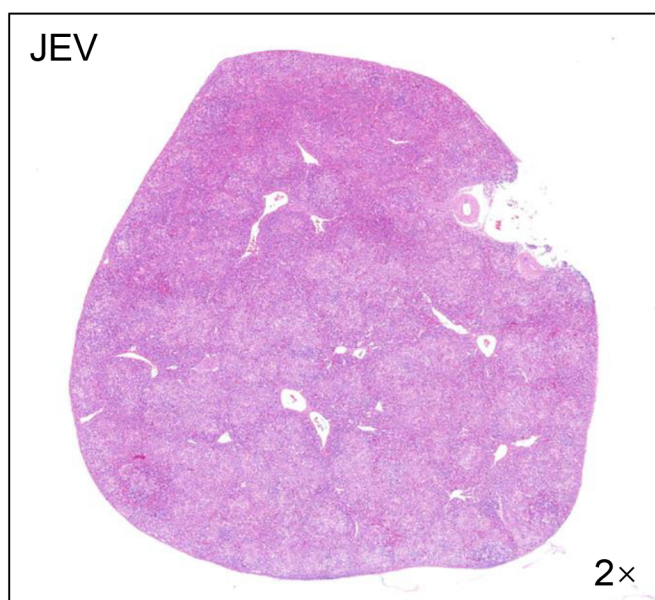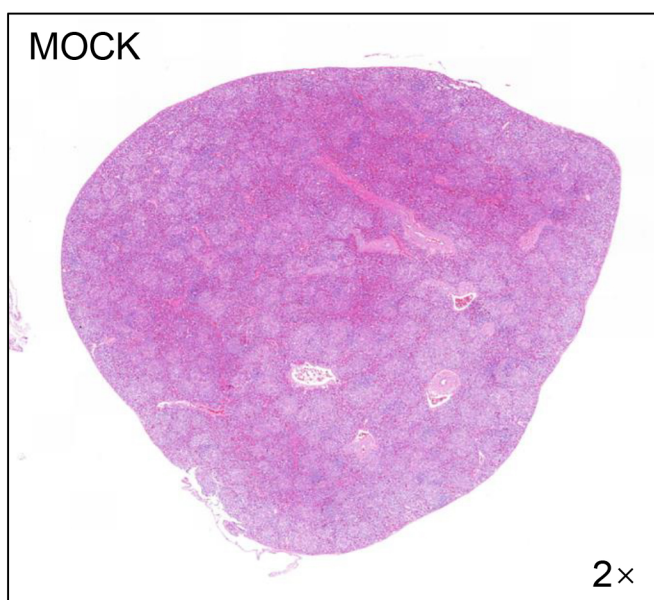

(b)

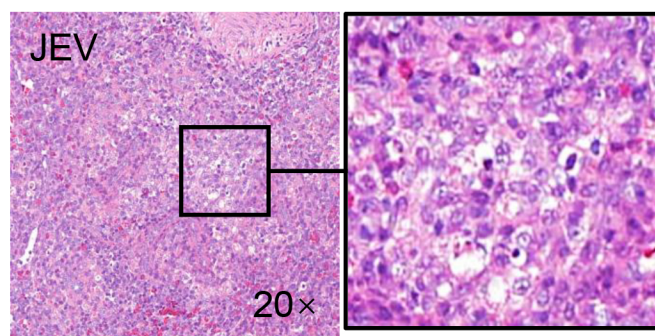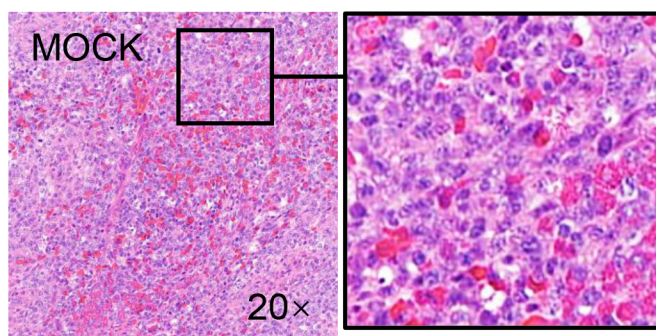

(c)

Supplement: s1 [file s1]
